# Supplementary material
Source: Springer Nature journal article supplement (https://www.springermedizin.de/resource/supplementary/12981_2007_70_MOESM3_ESM.pdf/9603792)

**Figure 3.** Kaplan-Meier analysis for the probability of free from HAART resumption.

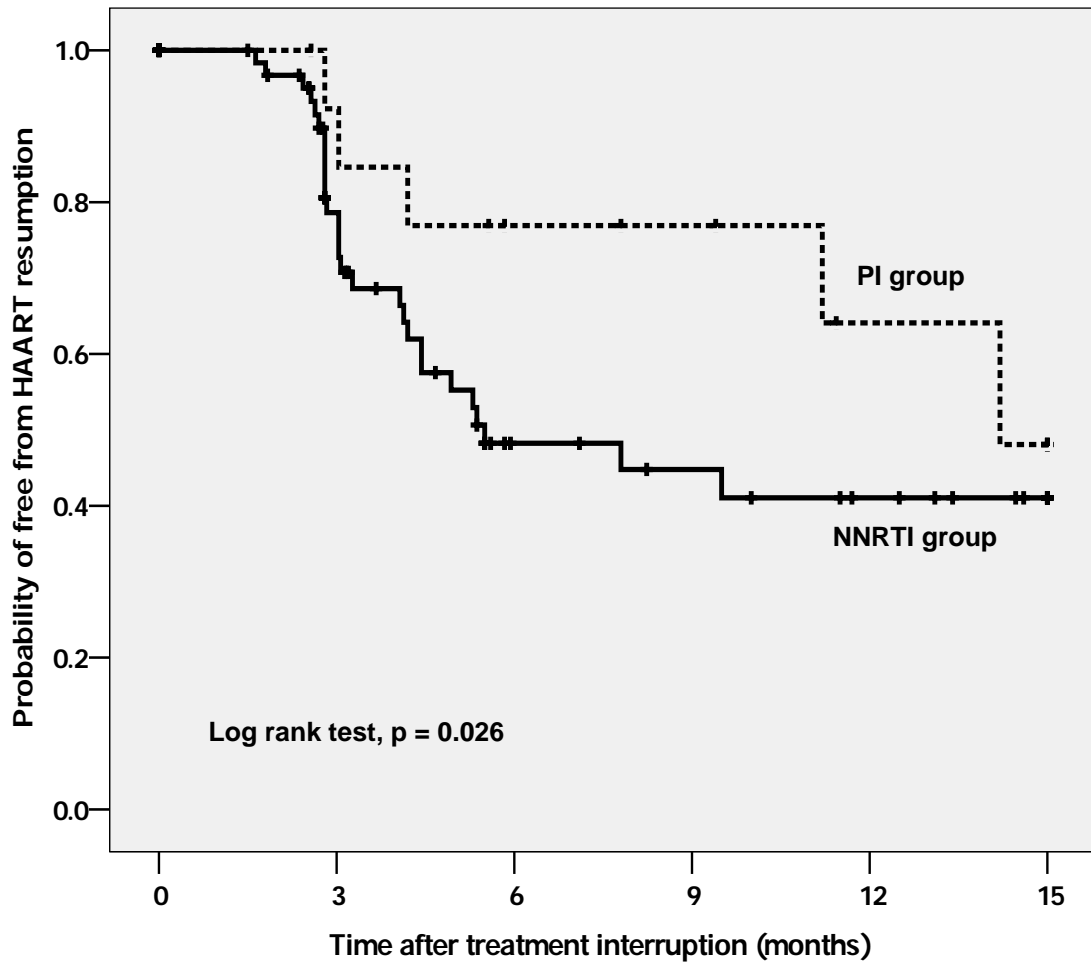

Supplement: MOESM3 [file 9603792]
